# Supplementary material
Source: PubMed Central journal article supplement (PMC1314743)
Supplement: 2003-043-s1.pdf [file 2003-043-s1.pdf]

## Supplementary information

*Supplementary Table 1. General practitioners' classification of the main problem presented by the patient in the consultation. The ratio of patients with a diagnosis of somatisation is presented for each GP.*

| GP from practice | Intervention group |     |            | GP from practice | Control group |     |            |
|------------------|--------------------|-----|------------|------------------|---------------|-----|------------|
|                  | Included           | GP+ | % GP+      |                  | Included      | GP+ | % GP+      |
| A                | 60                 | 2   | 3.3        | E                | 79            | 2   | 2.5        |
| SHP              | 67                 | 3   | 4.5        | E                | 64            | 2   | 3.1        |
| B                | 68                 | 4   | 5.9        | SHP              | 56            | 3   | 5.4        |
| A                | 65                 | 4   | 6.2        | SHP              | 50            | 3   | 6.0        |
| SHP              | 46                 | 3   | 6.5        | F                | 63            | 4   | 6.3        |
| C                | 53                 | 4   | 7.5        | G                | 67            | 5   | 7.5        |
| SHP              | 63                 | 6   | 9.5        | SHP              | 74            | 6   | 8.1        |
| A                | 59                 | 6   | 10.2       | H                | 87            | 8   | 9.2        |
| D                | 62                 | 7   | 11.3       | SHP              | 53            | 5   | 9.4        |
| C                | 76                 | 9   | 11.8       | H                | 70            | 7   | 10.0       |
| SHP              | 66                 | 8   | 12.1       | E                | 66            | 7   | 10.6       |
| A                | 60                 | 8   | 13.3       | E                | 77            | 9   | 11.7       |
| D                | 99                 | 16  | 16.2       | G                | 88            | 12  | 13.6       |
| SHP              | 68                 | 11  | 16.2       | SHP              | 111           | 16  | 14.4       |
| SHP              | 82                 | 14  | 17.1       | F                | 65            | 11  | 16.9       |
| SHP              | 72                 | 14  | 19.4       | SHP              | 106           | 20  | 18.9       |
| B                | 109                | 22  | 20.2       | G                | 64            | 14  | 21.9       |
| B                | 100                | 22  | 22.0       |                  |               |     |            |
| B                | 76                 | 18  | 23.7       |                  |               |     |            |
| D                | 56                 | 19  | 33.9       |                  |               |     |            |
| Total            | 1407               |     |            |                  | 1240          |     |            |
| Mean (SD)        |                    |     | 13.5 (7.7) |                  |               |     | 10.3 (5.4) |

GP+: dichotomised classification by general practitioner = medically unexplained symptoms, mental illness or no physical symptoms. SHP = Single handed practice; <sup>a</sup> t-test with equal variances;

The diagnostic difference between the mean of groups is 3.2, (95% CI = -1.3 to 7.7),  $P=0.156^a$
