# Supplementary material
Source: PubMed Central journal article supplement (PMC1314743)

Supplementary Figure 1. General practitioners' classification of the main problem presented by the patient in the consultation as 'somatisation' compared with results from a patient screening questionnaire for somatisation.

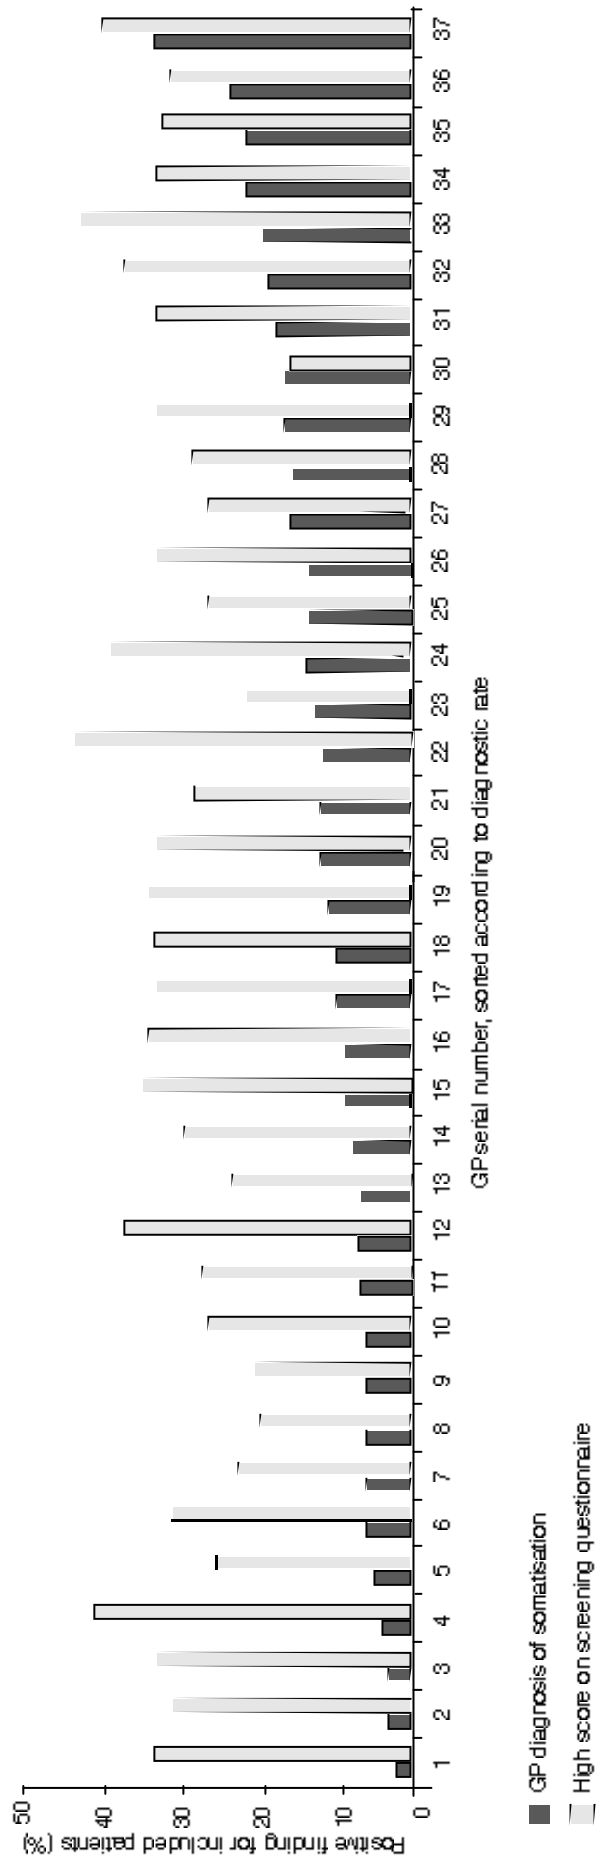

Supplement: 2003-043-s2.pdf [file 2003-043-s2.pdf]
